# Supplementary material
Source: PubMed Central journal article supplement (PMC3013002)
Supplement: supp_M110.138313_jbc.M110.138313-1.pdf [file supp_M110.138313_jbc.M110.138313-1.pdf]

Supplemental Table 1

**Comparison of Predicted OPB Proteins from Trypanosomatids**

| Species:                | AA Identity: | Length (AA): | kDa: | Catalytic Triad: |
|-------------------------|--------------|--------------|------|------------------|
| <i>L. donovani</i>      | 100.0%       | 731          | 83.1 | S577, D662, H697 |
| <i>L. infantum</i>      | 99.7%        | 731          | 83.1 | S577, D662, H697 |
| <i>L. major</i>         | 95.5%        | 731          | 83.0 | S577, D662, H697 |
| <i>L. amazonensis</i>   | 90.3%        | 731          | 83.5 | S577, D662, H697 |
| <i>L. braziliensis</i>  | 86.5%        | 731          | 83.1 | S577, D662, H697 |
| <i>T. cruzi</i>         | 63.2%        | 714          | 81.0 | S562, D647, H682 |
| <i>T. brucei brucei</i> | 62.1%        | 715          | 80.7 | S563, D648, H683 |
| <i>T. evansi</i>        | 61.8%        | 715          | 80.7 | S563, D648, H683 |

Supplemental Table 1. Comparison of predicted OPB proteins from trypanosomatids. The homologous OPB proteins predicted in five *Leishmania* and three *Trypanosoma* species are compared. Amino acid identities were compared to the sequence of *L. donovani* OPB. All of the proteins were found to be between 714 and 731 amino acids in length, between 80.7 and 83.5 kDa in mass, and to contain the conserved canonical clan SC catalytic triad.
