# Supplementary material
Source: PubMed Central journal article supplement (PMC3013002)
Supplement: supp_M110.138313_jbc.M110.138313-2.pdf [file supp_M110.138313_jbc.M110.138313-2.pdf]

## Supplemental Table 2

**Wildtype Infection**

| Gene ID   | Gene Name                                                  | Score(d) | Numer(r) | Denom(s+s0) | Fold Change |
|-----------|------------------------------------------------------------|----------|----------|-------------|-------------|
| mMC005764 | chemokine (C-C motif) ligand 7                             | 4.30     | 5.65     | 1.31        | 23.01       |
| mMC022537 | chemokine (C-C motif) ligand 2                             | 2.32     | 2.78     | 1.20        | 6.67        |
| mMC026407 | fatty acid binding protein 4, adipocyte                    | 2.54     | 1.99     | 0.78        | 5.23        |
| mMC016376 | matrix metalloproteinase 8                                 | 2.04     | 1.47     | 0.72        | 3.96        |
| mMC007495 | deiodinase, iodothyronine, type II                         | 1.84     | 1.70     | 0.92        | 3.78        |
| mMR027102 | histone 2, H2be                                            | 3.70     | 1.78     | 0.48        | 3.55        |
| mMC001616 | RIKEN cDNA A630082K20 gene                                 | 3.77     | 1.76     | 0.47        | 3.46        |
| mMC007881 | secretory leukocyte protease inhibitor                     | 2.28     | 1.59     | 0.70        | 3.44        |
| mMC014660 | cDNA sequence BC018601                                     | 2.65     | 1.59     | 0.60        | 2.81        |
| mMR030693 | angiopoietin-like 4                                        | 2.11     | 1.38     | 0.65        | 2.60        |
| mMC002127 | metallothionein 2                                          | 1.94     | 1.39     | 0.72        | 2.49        |
| mMC024097 | RIKEN cDNA 1110033J19 gene                                 | 2.90     | 1.29     | 0.45        | 2.46        |
| mMC010037 | myocyte maintenance                                        | 3.31     | 1.28     | 0.39        | 2.44        |
| mMC002484 | immunoresponsive gene 1                                    | 2.05     | 2.68     | 1.31        | 2.35        |
| mMR026966 | brain abundant, membrane attached signal protein 1         | 1.89     | 1.13     | 0.60        | 2.22        |
| mMC009603 | stromal cell-derived factor 2-like 1                       | 2.16     | 1.12     | 0.52        | 2.17        |
| mMR030367 | ubiquitin-conjugating enzyme E2E 1, UBC4/5 homolog (yeast) | 2.39     | 1.14     | 0.48        | 2.16        |
| mMC023478 | fatty acid binding protein 3, muscle and heart             | 1.88     | 1.02     | 0.54        | 2.08        |
| mMR026724 | RIKEN cDNA 1200016E24 gene                                 | 1.98     | 1.07     | 0.54        | 2.06        |
| mMR029959 | SRY-box containing gene 12                                 | 2.46     | 1.04     | 0.42        | 2.05        |
| mMR028069 | lamin A                                                    | 2.14     | 1.05     | 0.49        | 2.04        |
| mMC008807 | RIKEN cDNA 2500002B13 gene                                 | 2.02     | 1.03     | 0.51        | 2.03        |
| mMC005082 | cholesterol 25-hydroxylase                                 | -2.82    | -1.97    | 0.70        | 0.27        |

**OPB -/- Infection**

| Gene ID   | Gene Name                                                   | Score(d) | Numer(r) | Denom(s+s0) | Fold Change |
|-----------|-------------------------------------------------------------|----------|----------|-------------|-------------|
| mMC003602 | DNA2 DNA replication helicase 2-like (yeast)                | 3.75     | 3.52     | 0.94        | 9.64        |
| mMC007495 | deiodinase, iodothyronine, type II                          | 2.12     | 2.56     | 1.21        | 8.35        |
| mMC006170 | kit ligand                                                  | 4.25     | 2.95     | 0.69        | 7.57        |
| mMC005499 | RNA binding motif protein 28                                | 3.70     | 3.05     | 0.82        | 7.55        |
| mMC015111 | RIKEN cDNA 2900034E22 gene                                  | 3.08     | 3.24     | 1.05        | 7.48        |
| mMR001504 | Mus musculus clone MBI-29 H/ACA box snoRNA, partial seq     | 3.89     | 2.71     | 0.70        | 6.40        |
| mMC020007 | APG4 (ATG4) autophagy-related homolog C (S. cerevisiae)     | 3.51     | 2.60     | 0.74        | 6.32        |
| mMC000799 | expressed sequence AW146020                                 | 4.31     | 2.62     | 0.61        | 6.16        |
| mMC006086 | expressed sequence AI429613                                 | 4.11     | 2.60     | 0.63        | 6.12        |
| mMC013887 | RIKEN cDNA 2810446P07 gene                                  | 3.48     | 2.63     | 0.75        | 5.81        |
| mMC000878 | chromatin accessibility complex 1                           | 3.72     | 2.56     | 0.69        | 5.75        |
| mMC012003 | phosphatidylinositol 4-kinase type 2 beta                   | 4.19     | 2.51     | 0.60        | 5.72        |
| mMR029883 | RAN, member RAS oncogene family                             | 2.79     | 2.51     | 0.90        | 5.71        |
| mMC005979 | nucleolar protein 7                                         | 3.27     | 2.54     | 0.78        | 5.51        |
| mMC020739 | periphilin 1                                                | 3.76     | 2.44     | 0.65        | 5.46        |
| mMC004671 | putative homeodomain transcription factor 2                 | 3.00     | 2.64     | 0.88        | 5.45        |
| mMC021698 | retinoic acid early transcript 1E                           | 3.51     | 2.37     | 0.67        | 5.43        |
| mMC006003 | RIKEN cDNA 5730507C05 gene                                  | 3.32     | 2.48     | 0.75        | 5.42        |
| mMC017394 | WD repeat domain 43                                         | 3.23     | 2.44     | 0.75        | 5.39        |
| mMC001599 | RIKEN cDNA 2610020O08 gene                                  | 3.40     | 2.47     | 0.73        | 5.31        |
| mMC022779 | serine (or cysteine) proteinase inhibitor, clade B, member  | 2.62     | 3.03     | 1.16        | 5.16        |
| mMC014055 | GTPase activating RANGAP domain-like 1                      | 3.22     | 2.41     | 0.75        | 5.12        |
| mMC009664 | protein tyrosine phosphatase, non-receptor type 2           | 3.33     | 2.41     | 0.73        | 5.09        |
| mMC019852 | insulin induced gene 1                                      | 3.03     | 2.18     | 0.72        | 4.98        |
| mMC022310 | platelet-activating factor acetylhydrolase, isoform 1b, alp | 3.23     | 2.39     | 0.74        | 4.97        |
| mMC018879 | expressed sequence AU040576                                 | 3.22     | 2.34     | 0.73        | 4.95        |
| mMR029630 | RIKEN cDNA 5430439M09 gene                                  | 2.85     | 2.40     | 0.84        | 4.87        |
| mMC004407 | solute carrier family 25 (mitochondrial carrier, Graves dis | 3.16     | 2.36     | 0.75        | 4.85        |
| mMC001086 | N-sulfoglucosamine sulfohydrolase (sulfamidase)             | 3.08     | 2.34     | 0.76        | 4.79        |
| mMC016467 | enhancer of zeste homolog 2 (Drosophila)                    | 3.02     | 2.17     | 0.72        | 4.77        |
| mMC003291 | macrophage galactose N-acetyl-galactosamine specific lectin | 2.43     | 2.80     | 1.15        | 4.67        |
| mMC026407 | fatty acid binding protein 4, adipocyte                     | 2.21     | 1.99     | 0.90        | 4.61        |
| mMR030687 | splicing factor, arginine/serine-rich 10 (transformer 2 hom | 2.72     | 2.25     | 0.83        | 4.60        |
| mMC007638 | RIKEN cDNA 2210406H18 gene                                  | 2.34     | 2.21     | 0.95        | 4.56        |
| mMR027102 | histone 2, H2be                                             | 3.37     | 2.18     | 0.65        | 4.56        |

|           |                                                             |      |      |      |      |
|-----------|-------------------------------------------------------------|------|------|------|------|
| mMR027615 | PYD and CARD domain containing                              | 2.50 | 2.24 | 0.90 | 4.52 |
| mMC006658 | zinc finger protein 455                                     | 2.91 | 2.26 | 0.78 | 4.51 |
| mMC003422 | NADPH cytochrome B5 oxidoreductase                          | 3.00 | 2.24 | 0.75 | 4.47 |
| mMR027519 | zuotin related factor 2                                     | 2.75 | 2.23 | 0.81 | 4.47 |
| mMC007646 | RIKEN cDNA 5430440L12 gene                                  | 2.55 | 2.30 | 0.90 | 4.46 |
| mMC019084 | RIKEN cDNA 2610507B11 gene                                  | 2.62 | 2.56 | 0.98 | 4.42 |
| mMC001014 | phospholipase A2, activating protein                        | 3.05 | 2.17 | 0.71 | 4.38 |
| mMC023058 | RIKEN cDNA 2310057M21 gene                                  | 2.83 | 2.20 | 0.78 | 4.37 |
| mMC010037 | myocyte maintenance                                         | 3.75 | 2.13 | 0.57 | 4.37 |
| mMC003326 | NHL repeat containing 1                                     | 2.71 | 2.28 | 0.84 | 4.35 |
| mMC001719 | peroxiredoxin 6, related sequence 1                         | 2.50 | 2.28 | 0.91 | 4.35 |
| mMC009723 | TATA box binding protein-like 1                             | 2.63 | 2.28 | 0.87 | 4.35 |
| mMR030470 | retinoic acid early transcript delta                        | 2.10 | 2.13 | 1.01 | 4.33 |
| mMC003807 | FK506 binding protein-like                                  | 2.76 | 2.12 | 0.77 | 4.31 |
| mMC006411 | poly (A) polymerase alpha                                   | 2.78 | 2.20 | 0.79 | 4.31 |
| mMC004575 | PKD2 interactor, golgi and endoplasmic reticulum associated | 2.96 | 2.17 | 0.73 | 4.31 |
| mMR027673 | trans-acting transcription factor 3                         | 3.02 | 2.12 | 0.70 | 4.19 |
| mMC000940 | transmembrane 4 superfamily member 13                       | 2.47 | 2.13 | 0.86 | 4.15 |
| mMC020753 | DnaJ (Hsp40) homolog, subfamily C, member 1                 | 3.18 | 2.08 | 0.65 | 4.11 |
| mMC024520 | RIKEN cDNA 2610207I05 gene                                  | 2.75 | 2.11 | 0.77 | 4.10 |
| mMC002510 | RecQ protein-like                                           | 2.57 | 2.12 | 0.82 | 4.04 |
| mMC004095 | glutamate-cysteine ligase, catalytic subunit                | 1.91 | 2.14 | 1.12 | 4.04 |
| mMC018459 | RIKEN cDNA 2310076G09 gene                                  | 2.83 | 2.05 | 0.72 | 4.03 |
| mMC012317 | DNA segment, Chr 2, ERATO Doi 112, expressed                | 2.77 | 2.07 | 0.75 | 3.99 |
| mMC023750 | PAS domain containing serine/threonine kinase               | 1.90 | 1.89 | 1.00 | 3.98 |
| mMC011179 | glomulin, FKBP associated protein                           | 2.88 | 2.01 | 0.70 | 3.96 |
| mMC016376 | matrix metalloproteinase 8                                  | 1.88 | 1.62 | 0.86 | 3.93 |
| mMC016672 | RIKEN cDNA 1810012P15 gene                                  | 2.58 | 1.91 | 0.74 | 3.91 |
| mMC011284 | ankyrin repeat, family A (RFXANK-like), 2                   | 2.73 | 2.01 | 0.74 | 3.86 |
| mMC003195 | RIKEN cDNA 4930573I19 gene                                  | 2.51 | 1.97 | 0.78 | 3.85 |
| mMC007695 | fibroblast growth factor inducible 15                       | 2.21 | 2.16 | 0.98 | 3.85 |
| mMC023367 | dolichol-phosphate (beta-D) mannosyltransferase 1           | 2.35 | 2.34 | 1.00 | 3.83 |
| mMR030693 | angiopoietin-like 4                                         | 2.08 | 1.84 | 0.88 | 3.79 |
| mMC008415 | RIKEN cDNA 2310058A11 gene                                  | 2.49 | 2.11 | 0.85 | 3.79 |
| mMC004651 | FK506 binding protein 3                                     | 2.88 | 1.87 | 0.65 | 3.77 |
| mMC015762 | chromosome condensation 1-like                              | 2.36 | 2.00 | 0.85 | 3.76 |
| mMA032511 | Mus musculus zinc finger, CCHC domain containing 8 (Zcchc   | 3.05 | 1.92 | 0.63 | 3.76 |
| mMC004923 | RIKEN cDNA 1810027I20 gene                                  | 2.08 | 2.14 | 1.03 | 3.75 |
| mMC005919 | phosphoribosyl pyrophosphate synthetase 2                   | 2.37 | 2.12 | 0.89 | 3.73 |
| mMC022492 | RIKEN cDNA 1110034E15 gene                                  | 1.89 | 1.70 | 0.90 | 3.73 |
| mMC007601 | hydroxyacid oxidase 1, liver                                | 1.89 | 1.88 | 0.99 | 3.73 |
| mMC025755 | NOL1/NOP2/Sun domain family 3                               | 2.31 | 2.30 | 0.99 | 3.70 |
| mMR026859 | hypothenical APG4 (ATG4) autophagy-related homolog A pse    | 2.89 | 1.90 | 0.66 | 3.70 |
| mMC023380 | glucosamine-phosphate N-acetyltransferase 1                 | 2.72 | 1.93 | 0.71 | 3.70 |
| mMR028827 | ectonucleoside triphosphate diphosphohydrolase 1            | 1.86 | 1.96 | 1.05 | 3.69 |
| mMC006112 | RIKEN cDNA A930001N09 gene                                  | 2.34 | 2.06 | 0.88 | 3.69 |
| mMC016816 | RIKEN cDNA 9630054F20 gene                                  | 2.29 | 1.98 | 0.87 | 3.65 |
| mMC001651 | COP9 (constitutive photomorphogenic) homolog, subunit 2 (A  | 3.14 | 1.86 | 0.59 | 3.64 |
| mMC018207 | RIKEN cDNA 1700020I14 gene                                  | 2.09 | 2.10 | 1.01 | 3.60 |
| mMC001779 | SEC24 related gene family, member D (S. cerevisiae)         | 2.26 | 2.07 | 0.92 | 3.59 |
| mMC002342 | zinc finger, CSL domain containing 2                        | 2.27 | 2.00 | 0.88 | 3.58 |
| mMC007881 | secretory leukocyte protease inhibitor                      | 1.74 | 1.57 | 0.90 | 3.56 |
| mMC002008 | RIKEN cDNA 1110001C20 gene                                  | 2.47 | 1.89 | 0.77 | 3.53 |
| mMA035547 | Mus musculus interferon activated gene 205 (Ifi205), mRNA.  | 2.33 | 1.94 | 0.83 | 3.52 |
| mMC010936 | RIKEN cDNA 2310029O18 gene                                  | 2.84 | 1.83 | 0.65 | 3.52 |
| mMC001082 | RIKEN cDNA 1110034N17 gene                                  | 2.62 | 1.85 | 0.71 | 3.51 |
| mMC011453 | ubiquitin specific protease 38                              | 2.51 | 1.82 | 0.73 | 3.49 |
| mMC003340 | tumor necrosis factor receptor superfamily, member 23       | 2.30 | 1.85 | 0.80 | 3.49 |
| mMC021713 | RIKEN cDNA 6230421P05 gene                                  | 2.26 | 1.89 | 0.83 | 3.46 |
| mMC002631 | jagged 1                                                    | 1.67 | 1.79 | 1.07 | 3.44 |
| mMC022598 | histocompatibility 2, Q region locus 8                      | 1.94 | 1.99 | 1.03 | 3.44 |
| mMC008859 | UDP-Gal:betaGlcNAc beta 1,4-galactosyltransferase, polypep  | 2.35 | 1.89 | 0.80 | 3.42 |
| mMC013204 | von Hippel-Lindau syndrome homolog                          | 2.60 | 1.80 | 0.69 | 3.40 |
| mMC026330 | kelch-like 6 (Drosophila)                                   | 2.19 | 2.02 | 0.92 | 3.38 |
| mMC026163 | nucleoporin 50                                              | 2.31 | 1.82 | 0.79 | 3.38 |

|           |                                                             |      |      |      |      |
|-----------|-------------------------------------------------------------|------|------|------|------|
| mMC013312 | NMDA receptor-regulated gene 2                              | 2.56 | 1.77 | 0.69 | 3.36 |
| mMC009567 | RIKEN cDNA 2610019N13 gene                                  | 2.15 | 1.88 | 0.87 | 3.36 |
| mMC011259 | F-box only protein 5                                        | 1.75 | 1.86 | 1.07 | 3.33 |
| mMC006197 | DEAH (Asp-Glu-Ala-His) box polypeptide 40                   | 2.23 | 1.75 | 0.78 | 3.30 |
| mMC015711 | sirtuin 5 (silent mating type information regulation 2 homo | 2.38 | 1.75 | 0.74 | 3.29 |
| mMR030183 | hook homolog 3 (Drosophila)                                 | 2.38 | 1.77 | 0.74 | 3.29 |
| mMC012257 | DNA segment, Chr 8, ERATO Doi 233, expressed                | 2.42 | 1.72 | 0.71 | 3.27 |
| mMC011533 | lanosterol synthase                                         | 2.27 | 1.69 | 0.74 | 3.26 |
| mMC021173 | RIKEN cDNA 9130002C22 gene                                  | 1.92 | 1.79 | 0.93 | 3.25 |
| mMC022326 | DnaJ (Hsp40) homolog, subfamily B, member 4                 | 2.56 | 1.70 | 0.66 | 3.24 |
| mMC009793 | DNA methyltransferase 3A                                    | 1.89 | 1.51 | 0.80 | 3.24 |
| mMC004791 | synaptosomal-associated protein 23                          | 2.43 | 1.67 | 0.69 | 3.23 |
| mMC019905 | UDP-glucose dehydrogenase                                   | 2.82 | 1.67 | 0.59 | 3.22 |
| mMC009041 | WD repeat domain 35                                         | 2.37 | 1.67 | 0.70 | 3.21 |
| mMA034131 | Mus musculus DNA segment, Chr 2, ERATO Doi 750, expres      | 2.19 | 1.73 | 0.79 | 3.21 |
| mMC002439 | RIKEN cDNA 2610511M17 gene                                  | 2.39 | 1.74 | 0.73 | 3.20 |
| mMC010612 | sorting nexin 7                                             | 2.09 | 1.82 | 0.87 | 3.20 |
| mMC003808 | circadian locomoter output cycles kaput                     | 2.37 | 1.74 | 0.73 | 3.19 |
| mMC022146 | latrophilin 2                                               | 2.25 | 1.61 | 0.72 | 3.19 |
| mMC012033 | RIKEN cDNA 2210419I08 gene                                  | 1.95 | 1.84 | 0.95 | 3.19 |
| mMC019636 | RIKEN cDNA 2010003O18 gene                                  | 2.21 | 1.77 | 0.80 | 3.17 |
| mMC015704 | ring finger and KH domain containing 2                      | 2.80 | 1.64 | 0.59 | 3.17 |
| mMC021830 | cAMP responsive element binding protein 5                   | 1.97 | 1.72 | 0.87 | 3.17 |
| mMC013059 | ankyrin repeat and SOCS box-containing protein 4            | 1.91 | 1.71 | 0.90 | 3.16 |
| mMR028265 | G protein-coupled receptor 73                               | 1.96 | 1.68 | 0.85 | 3.16 |
| mMC007145 | cofilin 2, muscle                                           | 2.36 | 1.72 | 0.73 | 3.15 |
| mMC026427 | ubiquitin specific protease 10                              | 2.02 | 1.76 | 0.87 | 3.14 |
| mMC011549 | RIKEN cDNA E030003F13 gene                                  | 2.24 | 1.73 | 0.77 | 3.13 |
| mMC019239 | chromobox homolog 1 (Drosophila HP1 beta)                   | 2.14 | 1.82 | 0.85 | 3.11 |
| mMC009159 | kinesin-associated protein 3                                | 2.43 | 1.64 | 0.67 | 3.10 |
| mMC023391 | RIKEN cDNA 1110001A07 gene                                  | 1.71 | 1.53 | 0.89 | 3.10 |
| mMR028629 | DNA segment, Chr 6, Brigham & Women's Genetics 1452 exj     | 2.85 | 1.63 | 0.57 | 3.09 |
| mMC009076 | RIKEN cDNA 1300019C06 gene                                  | 2.39 | 1.63 | 0.68 | 3.09 |
| mMC017202 | RIKEN cDNA 2400002F11 gene                                  | 2.51 | 1.65 | 0.66 | 3.09 |
| mMA033045 | Mus musculus rabaptin, RAB GTPase binding effector protei   | 2.05 | 1.74 | 0.85 | 3.08 |
| mMR029680 | PHD finger protein 12                                       | 2.44 | 1.67 | 0.69 | 3.08 |
| mMC026053 | tumor necrosis factor (ligand) superfamily, member 12       | 2.22 | 1.62 | 0.73 | 3.08 |
| mMA031304 | Mus musculus Down syndrome critical region homolog 1 (hur   | 1.47 | 1.33 | 0.91 | 3.07 |
| mMC007564 | B lymphoma Mo-MLV insertion region 1                        | 2.18 | 1.67 | 0.77 | 3.05 |
| mMC003457 | expressed sequence C80587                                   | 2.26 | 1.63 | 0.72 | 3.04 |
| mMC017151 | mesoderm development candidate 1                            | 2.33 | 1.61 | 0.69 | 3.03 |
| mMC015675 | DnaJ (Hsp40) homolog, subfamily C, member 14                | 2.25 | 1.71 | 0.76 | 3.03 |
| mMC004995 | RAB8B, member RAS oncogene family                           | 1.90 | 1.82 | 0.96 | 3.03 |
| mMC004457 | RIKEN cDNA 2410007P03 gene                                  | 2.45 | 1.61 | 0.66 | 3.02 |
| mMC003929 | plexin A2                                                   | 1.85 | 1.55 | 0.84 | 3.02 |
| mMC005570 | RIKEN cDNA 2510006C20 gene                                  | 2.59 | 1.61 | 0.62 | 3.01 |
| mMC023571 | zinc finger, BED domain containing 4                        | 2.36 | 1.61 | 0.68 | 3.00 |
| mMC011944 | acid phosphatase 5, tartrate resistant                      | 1.98 | 1.65 | 0.83 | 3.00 |
| mMC018891 | RIKEN cDNA 2700023J09 gene                                  | 2.36 | 1.63 | 0.69 | 3.00 |
| mMC016277 | N-acetyltransferase 2 (arylamine N-acetyltransferase)       | 2.51 | 1.57 | 0.63 | 3.00 |
| mMC020919 | ubiquitin-conjugating enzyme E2 variant 2                   | 2.07 | 1.65 | 0.79 | 3.00 |
| mMC023668 | microtubule-associated protein 4                            | 2.31 | 1.62 | 0.70 | 3.00 |
| mMC001616 | RIKEN cDNA A630082K20 gene                                  | 2.49 | 1.57 | 0.63 | 2.99 |
| mMC006363 | proline-rich nuclear receptor coactivator 1                 | 1.84 | 1.85 | 1.01 | 2.98 |
| mMC004455 | RIKEN cDNA 2310044D20 gene                                  | 2.08 | 1.62 | 0.78 | 2.98 |
| mMC012964 | RIKEN cDNA B230337E12 gene                                  | 2.16 | 1.66 | 0.77 | 2.98 |
| mMC010815 | RIKEN cDNA 2810422B04 gene                                  | 2.15 | 1.62 | 0.75 | 2.98 |
| mMC002511 | RIKEN cDNA A630084N20 gene                                  | 2.06 | 1.60 | 0.78 | 2.97 |
| mMC009821 | general transcription factor II H, polypeptide 2            | 2.20 | 1.64 | 0.75 | 2.97 |
| mMC019911 | nuclear factor of activated T-cells, cytoplasmic, calcineur | 2.07 | 1.72 | 0.83 | 2.96 |
| mMR026751 | RIKEN cDNA C530046L02 gene                                  | 2.10 | 1.63 | 0.78 | 2.95 |
| mMC013647 | RIKEN cDNA A430103D13 gene                                  | 2.21 | 1.61 | 0.73 | 2.94 |
| mMC002187 | RIKEN cDNA 4921505D17 gene                                  | 2.29 | 1.54 | 0.67 | 2.93 |
| mMC000928 | a disintegrin-like and metalloprotease (repolysin type) wi  | 1.97 | 1.72 | 0.87 | 2.93 |
| mMC005429 | RIKEN cDNA 2810405K07 gene                                  | 1.91 | 1.67 | 0.87 | 2.93 |

|           |                                                             |      |      |      |      |
|-----------|-------------------------------------------------------------|------|------|------|------|
| mMC024399 | potassium intermediate/small conductance calcium-activated  | 1.95 | 1.63 | 0.84 | 2.93 |
| mMA033303 | Mus musculus phosphorylase kinase alpha 1 (Phka1), mRNA     | 2.44 | 1.55 | 0.63 | 2.91 |
| mMA035703 | Mus musculus RIKEN cDNA 4930506M07 gene, mRNA (cDN          | 1.65 | 1.81 | 1.10 | 2.91 |
| mMA032222 | Mus musculus 6 days neonate head cDNA, RIKEN full-length    | 1.98 | 1.55 | 0.78 | 2.87 |
| mMC010121 | SLAM family member 8                                        | 1.41 | 2.09 | 1.48 | 2.87 |
| mMC021844 | hect domain and RLD 3                                       | 1.71 | 1.77 | 1.04 | 2.85 |
| mMC005785 | RIKEN cDNA 9030411K21 gene                                  | 2.45 | 1.51 | 0.62 | 2.85 |
| mMC007399 | heat shock 27kDa protein 8                                  | 2.52 | 1.51 | 0.60 | 2.84 |
| mMC007156 | zinc finger protein 26                                      | 2.04 | 1.59 | 0.78 | 2.84 |
| mMR027267 | armadillo repeat containing 1                               | 2.13 | 1.54 | 0.72 | 2.82 |
| mMC005407 | zinc finger protein 160                                     | 2.15 | 1.52 | 0.71 | 2.82 |
| mMC023353 | zinc finger protein 422                                     | 2.26 | 1.49 | 0.66 | 2.81 |
| mMC021951 | RIKEN cDNA 1110028E10 gene                                  | 1.91 | 1.51 | 0.79 | 2.81 |
| mMC011081 | RIKEN cDNA 4932415D10 gene                                  | 2.03 | 1.51 | 0.75 | 2.80 |
| mMC006530 | special AT-rich sequence binding protein 2                  | 1.78 | 1.72 | 0.97 | 2.80 |
| mMA034622 | Mus musculus 5'-nucleotidase, cytosolic II (Nt5c2), mRNA.   | 1.62 | 1.81 | 1.12 | 2.79 |
| mMC011726 | eukaryotic translation initiation factor 2 alpha kinase 1   | 1.80 | 1.64 | 0.91 | 2.78 |
| mMC016695 | transmembrane 4 superfamily member 9                        | 2.03 | 1.56 | 0.77 | 2.78 |
| mMC025324 | RIKEN cDNA 2610312E17 gene                                  | 1.96 | 1.51 | 0.77 | 2.78 |
| mMC014731 | DNA segment, Chr 9, Wayne State University 20, expressed    | 2.07 | 1.50 | 0.72 | 2.77 |
| mMR027878 | FUN14 domain containing 2                                   | 1.81 | 1.62 | 0.90 | 2.77 |
| mMC001564 | DNA segment, Chr 10, Brigham & Women's Genetics 1379 e.     | 2.17 | 1.49 | 0.69 | 2.76 |
| mMC025826 | RIKEN cDNA 1500010M24 gene                                  | 1.85 | 1.59 | 0.86 | 2.76 |
| mMC003206 | RIKEN cDNA 4632434I11 gene                                  | 1.64 | 1.70 | 1.04 | 2.74 |
| mMC006819 | ras homolog gene family, member J                           | 1.42 | 1.32 | 0.93 | 2.74 |
| mMR027112 | eukaryotic translation initiation factor 2, subunit 1 alpha | 1.91 | 1.43 | 0.75 | 2.72 |
| mMC015679 | RIKEN cDNA 5133401H06 gene                                  | 1.90 | 1.49 | 0.78 | 2.71 |
| mMC004482 | mitochondrial ribosomal protein S5                          | 2.03 | 1.45 | 0.71 | 2.71 |
| mMR028755 | RIKEN cDNA A430108B07 gene                                  | 1.78 | 1.73 | 0.97 | 2.71 |
| mMC005260 | RIKEN cDNA 3110057O12 gene                                  | 1.73 | 1.49 | 0.86 | 2.71 |
| mMC003099 | DNA segment, Chr 5, ERATO Doi 579, expressed                | 2.04 | 1.51 | 0.74 | 2.71 |
| mMC002050 | RIKEN cDNA 9930021J03 gene                                  | 2.31 | 1.44 | 0.63 | 2.71 |
| mMR029306 | EPM2A (laforin) interacting protein 1                       | 2.04 | 1.53 | 0.75 | 2.71 |
| mMC000866 | limb and neural patterns                                    | 1.77 | 1.57 | 0.89 | 2.71 |
| mMC010805 | ADP-ribosyltransferase (NAD+; poly (ADP-ribose) polymeras   | 2.22 | 1.43 | 0.64 | 2.70 |
| mMC020070 | cDNA sequence BC021921                                      | 2.13 | 1.46 | 0.69 | 2.70 |
| mMC001946 | cytoplasmic polyadenylation element binding protein 2       | 1.73 | 1.57 | 0.90 | 2.70 |
| mMR027842 | proteasome (prosome, macropain) 26S subunit, non-ATPase     | 1.88 | 1.51 | 0.80 | 2.69 |
| mMC010394 | ARP6 actin-related protein 6 homolog (yeast)                | 2.25 | 1.45 | 0.65 | 2.69 |
| mMC020981 | RIKEN cDNA F630043A04 gene                                  | 1.55 | 1.26 | 0.81 | 2.67 |
| mMC006820 | nuclear antigen Sp100                                       | 1.93 | 1.43 | 0.74 | 2.67 |
| mMC021725 | RIKEN cDNA C630016O21 gene                                  | 1.86 | 1.51 | 0.81 | 2.67 |
| mMC002621 | tubulin-specific chaperone e                                | 2.20 | 1.43 | 0.65 | 2.66 |
| mMC002092 | oxysterol binding protein-like 9                            | 2.34 | 1.41 | 0.60 | 2.65 |
| mMA034958 | Mus musculus aspartate-beta-hydroxylase (Asph), mRNA.       | 1.76 | 1.56 | 0.89 | 2.65 |
| mMC016445 | CCR4 carbon catabolite repression 4-like (S. cerevisiae)    | 1.22 | 1.25 | 1.03 | 2.64 |
| mMC008139 | schlafen 10                                                 | 1.95 | 1.47 | 0.75 | 2.64 |
| mMC022526 | caspase recruitment domain family, member 12                | 1.61 | 1.31 | 0.81 | 2.64 |
| mMC022791 | peroxiredoxin 6, related sequence 1                         | 1.78 | 1.52 | 0.85 | 2.62 |
| mMC003015 | core 1 UDP-galactose:N-acetylgalactosamine-alpha-R beta 1   | 1.80 | 1.55 | 0.86 | 2.62 |
| mMC006165 | ras homolog gene family, member V                           | 2.20 | 1.41 | 0.64 | 2.62 |
| mMC002897 | RIKEN cDNA 5730494M16 gene                                  | 1.77 | 1.43 | 0.81 | 2.62 |
| mMC003473 | ubiquitin specific protease 28                              | 2.39 | 1.37 | 0.57 | 2.61 |
| mMC019731 | RIKEN cDNA 1110033L15 gene                                  | 1.76 | 1.36 | 0.77 | 2.61 |
| mMR030266 | c6.1a protein                                               | 1.72 | 1.56 | 0.91 | 2.60 |
| mMR030591 | interleukin-1 receptor-associated kinase 1                  | 1.87 | 1.50 | 0.80 | 2.59 |
| mMC010253 | intergral membrane protein 1                                | 1.71 | 1.31 | 0.76 | 2.59 |
| mMC020225 | RIKEN cDNA A230048G03 gene                                  | 1.89 | 1.43 | 0.75 | 2.58 |
| mMC023416 | WD repeat domain 37                                         | 2.03 | 1.40 | 0.69 | 2.58 |
| mMR029694 | gamma-aminobutyric acid (GABA-A) receptor-associated pro    | 1.56 | 1.56 | 1.00 | 2.58 |
| mMR027495 | RIKEN cDNA 2810441O16 gene                                  | 1.74 | 1.55 | 0.89 | 2.58 |
| mMC022875 | capping protein (actin filament) muscle Z-line, alpha 2     | 1.90 | 1.47 | 0.77 | 2.57 |
| mMC016182 | oncoprotein induced transcript 3                            | 1.65 | 1.38 | 0.84 | 2.57 |
| mMC005469 | acylphosphatase 2, muscle type                              | 2.01 | 1.39 | 0.69 | 2.57 |
| mMR027553 | tripartite motif protein 2                                  | 1.75 | 1.35 | 0.77 | 2.56 |

|           |                                                             |      |      |      |      |
|-----------|-------------------------------------------------------------|------|------|------|------|
| mMC014679 | transcription factor AP4                                    | 1.47 | 1.23 | 0.84 | 2.56 |
| mMC022132 | RIKEN cDNA 4831403C07 gene                                  | 1.73 | 1.35 | 0.78 | 2.56 |
| mMC006784 | RIKEN cDNA 2210011G09 gene                                  | 1.66 | 1.50 | 0.90 | 2.56 |
| mMC001815 | RIKEN cDNA 2410017118 gene                                  | 1.83 | 1.47 | 0.81 | 2.55 |
| mMR031192 | SMC5 structural maintenance of chromosomes 5-like 1 (yeas   | 1.81 | 1.48 | 0.82 | 2.54 |
| mMC016096 | nucleoporin 153                                             | 1.75 | 1.62 | 0.93 | 2.53 |
| mMC023947 | polymerase (RNA) III (DNA directed) polypeptide K           | 1.94 | 1.38 | 0.71 | 2.53 |
| mMC001036 | vaccinia related kinase 2                                   | 1.94 | 1.37 | 0.70 | 2.53 |
| mMR030258 | DNA segment, Chr 14, Abbott 1 expressed                     | 2.07 | 1.37 | 0.66 | 2.53 |
| mMC024484 | CD24a antigen                                               | 1.38 | 1.61 | 1.16 | 2.53 |
| mMC021269 | UDP-GlcNAc:betaGal beta-1,3-N-acetylglucosaminyltransfer    | 1.91 | 1.38 | 0.72 | 2.53 |
| mMR027003 | RIKEN cDNA 1300013D05 gene                                  | 2.01 | 1.38 | 0.69 | 2.52 |
| mMC012523 | 3-hydroxyisobutyryl-Coenzyme A hydrolase                    | 2.00 | 1.36 | 0.68 | 2.51 |
| mMC026141 | RIKEN cDNA C130067A03 gene                                  | 2.04 | 1.36 | 0.67 | 2.51 |
| mMC001805 | RIKEN cDNA C430048L16 gene                                  | 1.87 | 1.28 | 0.68 | 2.51 |
| mMC016289 | expressed sequence AI316802                                 | 1.74 | 1.37 | 0.79 | 2.51 |
| mMC001985 | RIKEN cDNA 1110056N09 gene                                  | 1.69 | 1.46 | 0.87 | 2.50 |
| mMC017515 | RIKEN cDNA 9130409J20 gene                                  | 1.95 | 1.32 | 0.68 | 2.49 |
| mMA035641 | Mus musculus 8 days embryo whole body cDNA, RIKEN full-     | 1.91 | 1.36 | 0.71 | 2.47 |
| mMC006447 | RIKEN cDNA B630005N14 gene                                  | 1.46 | 1.48 | 1.01 | 2.47 |
| mMC002164 | FSHD region gene 1                                          | 2.12 | 1.31 | 0.62 | 2.46 |
| mMC015123 | leucine rich repeat containing 28                           | 1.86 | 1.30 | 0.70 | 2.45 |
| mMC018076 | testis expressed gene 2                                     | 1.80 | 1.38 | 0.76 | 2.45 |
| mMC025088 | endothelial differentiation, lysophosphatidic acid G-protei | 1.49 | 1.37 | 0.92 | 2.45 |
| mMC004717 | glycoprotein 38                                             | 1.51 | 1.60 | 1.06 | 2.45 |
| mMC018148 | solute carrier family 16 (monocarboxylic acid transporters) | 1.78 | 1.34 | 0.75 | 2.44 |
| mMR028649 | netrin 3                                                    | 2.03 | 1.32 | 0.65 | 2.44 |
| mMR030819 | RIKEN cDNA 9430034D17 gene                                  | 1.65 | 1.33 | 0.81 | 2.44 |
| mMR028143 | tripartite motif protein 13                                 | 1.63 | 1.50 | 0.92 | 2.44 |
| mMC010046 | SEC15-like 1 (S. cerevisiae)                                | 1.56 | 1.42 | 0.91 | 2.43 |
| mMA031840 | Mus musculus adult male cecum cDNA, RIKEN full-length en    | 1.92 | 1.31 | 0.68 | 2.43 |
| mMR030115 | RIKEN cDNA 2810431I02 gene                                  | 1.90 | 1.31 | 0.69 | 2.43 |
| mMC018712 | DNA segment, Chr 8, ERATO Doi 531, expressed                | 1.59 | 1.44 | 0.91 | 2.43 |
| mMR027137 | oxysterol binding protein-like 8                            | 1.84 | 1.29 | 0.70 | 2.43 |
| mMC018495 | RIKEN cDNA 1200015F23 gene                                  | 1.80 | 1.32 | 0.73 | 2.42 |
| mMR027578 | MGC46821                                                    | 1.71 | 1.57 | 0.92 | 2.42 |
| mMC022369 | RIKEN cDNA 2900022M12 gene                                  | 1.75 | 1.28 | 0.73 | 2.42 |
| mMA033843 | Mus musculus RIKEN cDNA 2700038I16 gene, mRNA (cDNA/        | 1.83 | 1.34 | 0.73 | 2.42 |
| mMC012962 | RIKEN cDNA 2610037P13 gene                                  | 2.00 | 1.30 | 0.65 | 2.42 |
| mMC016371 | aldolase 3, C isoform                                       | 1.78 | 1.28 | 0.72 | 2.40 |
| mMC014018 | mitochondrial ribosomal protein S22                         | 1.68 | 1.28 | 0.77 | 2.40 |
| mMC008450 | HRAS like suppressor 3                                      | 1.64 | 1.39 | 0.84 | 2.40 |
| mMC015662 | transforming growth factor, beta receptor I                 | 1.48 | 1.51 | 1.02 | 2.40 |
| mMR030699 | expressed sequence C80879                                   | 1.93 | 1.29 | 0.67 | 2.40 |
| mMC018822 | RIKEN cDNA 2010110K16 gene                                  | 1.83 | 1.27 | 0.69 | 2.39 |
| mMC002835 | RIKEN cDNA 2010204I15 gene                                  | 1.56 | 1.19 | 0.77 | 2.39 |
| mMC018999 | RIKEN cDNA 3110001E11 gene                                  | 1.50 | 1.40 | 0.93 | 2.38 |
| mMR030391 | RIKEN cDNA A630089N07 gene                                  | 2.08 | 1.23 | 0.59 | 2.38 |
| mMR031070 | RIKEN cDNA 4932432K03 gene                                  | 1.76 | 1.32 | 0.75 | 2.38 |
| mMC015955 | RIKEN cDNA D030028O16 gene                                  | 1.91 | 1.26 | 0.66 | 2.38 |
| mMC008511 | leucine rich repeat containing 20                           | 1.64 | 1.33 | 0.81 | 2.37 |
| mMC017499 | RIKEN cDNA 6430590I03 gene                                  | 1.66 | 1.41 | 0.85 | 2.37 |
| mMC003402 | RIKEN cDNA 6620401M08 gene                                  | 1.80 | 1.25 | 0.69 | 2.37 |
| mMC006315 | malic enzyme, supernatant                                   | 1.45 | 1.45 | 1.00 | 2.37 |
| mMR029739 | cDNA sequence BC003885                                      | 2.04 | 1.25 | 0.61 | 2.36 |
| mMC009772 | poly(A) polymerase gamma                                    | 1.71 | 1.26 | 0.74 | 2.36 |
| mMC023187 | aspartate-beta-hydroxylase                                  | 1.83 | 1.27 | 0.70 | 2.36 |
| mMR026133 | complement component 1, r subcomponent                      | 1.63 | 1.11 | 0.68 | 2.35 |
| mMC008383 | RIKEN cDNA 2700038L12 gene                                  | 1.95 | 1.25 | 0.64 | 2.35 |
| mMC008274 | RIKEN cDNA A530088I07 gene                                  | 1.54 | 1.55 | 1.01 | 2.34 |
| mMC016947 | RIKEN cDNA 1700090G07 gene                                  | 1.80 | 1.28 | 0.71 | 2.34 |
| mMC012711 | RIKEN cDNA 2210015D19 gene                                  | 1.76 | 1.28 | 0.73 | 2.34 |
| mMC005044 | limb region 1                                               | 1.59 | 1.58 | 0.99 | 2.33 |
| mMR026757 | LIM and senescent cell antigen-like domains 1               | 1.87 | 1.21 | 0.64 | 2.33 |
| mMC010382 | RIKEN cDNA 2810012D02 gene                                  | 1.57 | 1.18 | 0.75 | 2.33 |

|           |                                                             |      |      |      |      |
|-----------|-------------------------------------------------------------|------|------|------|------|
| mMC023926 | insulin induced gene 1                                      | 1.69 | 1.31 | 0.78 | 2.33 |
| mMC015746 | ankyrin repeat and IBR domain containing 1                  | 1.72 | 1.27 | 0.74 | 2.32 |
| mMR027664 | RIKEN cDNA 5830407P18 gene                                  | 1.66 | 1.26 | 0.76 | 2.31 |
| mMC007719 | MYC-associated zinc finger protein (purine-binding transcri | 1.70 | 1.26 | 0.74 | 2.31 |
| mMC014837 | zinc finger, BED domain containing 3                        | 1.71 | 1.21 | 0.71 | 2.31 |
| mMC026355 | G protein-coupled receptor 103                              | 1.87 | 1.23 | 0.66 | 2.30 |
| mMC001085 | protease, serine, 16 (thymus)                               | 1.60 | 1.27 | 0.79 | 2.29 |
| mMC017539 | SEC24 related gene family, member A (S. cerevisiae)         | 1.90 | 1.20 | 0.63 | 2.29 |
| mMC018557 | RAS-like, family 2, locus 9                                 | 1.51 | 1.14 | 0.75 | 2.29 |
| mMC017726 | transmembrane protein 14A                                   | 1.66 | 1.21 | 0.73 | 2.29 |
| mMC003462 | RIKEN cDNA 1300002K09 gene                                  | 1.36 | 1.04 | 0.76 | 2.29 |
| mMC021651 | RIKEN cDNA 4833424O12 gene                                  | 1.71 | 1.19 | 0.69 | 2.28 |
| mMC004549 | jumonji domain containing 1B                                | 1.57 | 1.28 | 0.82 | 2.28 |
| mMC018246 | FERM domain containing 4A                                   | 1.66 | 1.27 | 0.76 | 2.28 |
| mMR030169 | RIKEN cDNA 2700079J08 gene                                  | 1.57 | 1.18 | 0.75 | 2.28 |
| mMC000893 | RIKEN cDNA 9030607L20 gene                                  | 1.73 | 1.22 | 0.71 | 2.27 |
| mMA034791 | Mus musculus 12 days embryo male wolffian duct includes st  | 1.59 | 1.40 | 0.88 | 2.27 |
| mMC000771 | adenosine deaminase                                         | 1.70 | 1.20 | 0.71 | 2.27 |
| mMC014717 | RIKEN cDNA 3110027N22 gene                                  | 1.82 | 1.21 | 0.66 | 2.27 |
| mMC009713 | phosphoserine phosphatase                                   | 1.34 | 1.18 | 0.88 | 2.27 |
| mMC002995 | EF hand domain containing 2                                 | 1.56 | 1.19 | 0.76 | 2.27 |
| mMC010493 | tyrosyl-tRNA synthetase                                     | 1.37 | 1.42 | 1.04 | 2.26 |
| mMR028261 | aldo-keto reductase family 1, member C12                    | 1.60 | 1.27 | 0.79 | 2.26 |
| mMC018484 | ubiquitin specific protease 25                              | 1.70 | 1.23 | 0.72 | 2.26 |
| mMC006375 | RIKEN cDNA 2810002D13 gene                                  | 1.76 | 1.23 | 0.70 | 2.26 |
| mMC010227 | nuclear factor, interleukin 3, regulated                    | 1.67 | 1.21 | 0.72 | 2.26 |
| mMC012844 | hypoxia induced gene 1                                      | 1.72 | 1.21 | 0.71 | 2.25 |
| mMC002464 | RIKEN cDNA 5430430B14 gene                                  | 1.78 | 1.21 | 0.68 | 2.25 |
| mMC009051 | synaptojanin 2                                              | 1.64 | 1.17 | 0.71 | 2.25 |
| mMC012867 | pantothenate kinase 3                                       | 1.58 | 1.21 | 0.77 | 2.25 |
| mMC007598 | gephyrin                                                    | 1.70 | 1.22 | 0.72 | 2.24 |
| mMC025313 | RIKEN cDNA 2810484M10 gene                                  | 1.62 | 1.26 | 0.78 | 2.24 |
| mMC005486 | RAB28, member RAS oncogene family                           | 1.67 | 1.25 | 0.75 | 2.24 |
| mMC013442 | solute carrier family 37 (glycerol-3-phosphate transporter) | 1.49 | 1.22 | 0.82 | 2.24 |
| mMC016934 | zinc finger protein 27                                      | 1.58 | 1.21 | 0.77 | 2.23 |
| mMC020847 | hypothetical gene supported by AK078282; AK078855; BC05     | 1.69 | 1.22 | 0.72 | 2.23 |
| mMC022335 | chromosome segregation 1-like (S. cerevisiae)               | 1.45 | 1.31 | 0.90 | 2.23 |
| mMC001600 | RIKEN cDNA 4930453O03 gene                                  | 1.79 | 1.19 | 0.67 | 2.23 |
| mMC006880 | RIKEN cDNA 2810405F18 gene                                  | 1.54 | 1.24 | 0.80 | 2.23 |
| mMC022192 | zinc finger protein 617                                     | 1.55 | 1.17 | 0.75 | 2.23 |
| mMR026176 | RIKEN cDNA 4432404P07 gene                                  | 1.66 | 1.19 | 0.72 | 2.22 |
| mMC014713 | membrane-spanning 4-domains, subfamily A, member 7          | 1.20 | 1.22 | 1.02 | 2.22 |
| mMC007864 | FMS-like tyrosine kinase 1                                  | 1.51 | 1.16 | 0.77 | 2.22 |
| mMC014217 | tumor differentially expressed 1                            | 1.41 | 1.25 | 0.89 | 2.22 |
| mMC020727 | X-linked lymphocyte-regulated 3a                            | 1.62 | 1.23 | 0.76 | 2.22 |
| mMR029587 | ubiquitin-conjugating enzyme E2N                            | 1.81 | 1.18 | 0.65 | 2.22 |
| mMC022710 | RIKEN cDNA 5830469G19 gene                                  | 1.91 | 1.16 | 0.61 | 2.22 |
| mMC005883 | RIKEN cDNA 1110021E09 gene                                  | 1.69 | 1.21 | 0.71 | 2.22 |
| mMC014733 | trinucleotide repeat containing 4                           | 1.33 | 1.03 | 0.78 | 2.21 |
| mMC007072 | expressed sequence BB128963                                 | 1.60 | 1.27 | 0.79 | 2.21 |
| mMA032883 | Mus musculus nuclear receptor coactivator 4 (Ncoa4), mRNA   | 1.32 | 1.55 | 1.17 | 2.21 |
| mMR029959 | SRY-box containing gene 12                                  | 1.87 | 1.15 | 0.61 | 2.20 |
| mMC011764 | sialyltransferase 7 ((alpha-N-acetylneuraminyl 2,3-betagala | 1.60 | 1.24 | 0.78 | 2.20 |
| mMC003111 | coiled-coil domain containing 2                             | 1.65 | 1.21 | 0.74 | 2.20 |
| mMC023858 | RIKEN cDNA 2600016B03 gene                                  | 1.55 | 1.35 | 0.87 | 2.20 |
| mMC014572 | F-box and WD-40 domain protein 2                            | 1.85 | 1.16 | 0.62 | 2.20 |
| mMC001876 | eukaryotic translation initiation factor 2, subunit 2 (beta | 1.37 | 1.38 | 1.01 | 2.19 |
| mMC005345 | RIKEN cDNA A730004F22 gene                                  | 1.44 | 1.25 | 0.87 | 2.19 |
| mMC015219 | CDC28 protein kinase 1                                      | 1.80 | 1.13 | 0.63 | 2.19 |
| mMC000820 | interferon consensus sequence binding protein 1             | 1.45 | 1.15 | 0.79 | 2.18 |
| mMR031038 | RIKEN cDNA 1200003I10 gene                                  | 1.36 | 0.99 | 0.73 | 2.18 |
| mMC007447 | RIKEN cDNA C130067A03 gene                                  | 1.73 | 1.15 | 0.66 | 2.18 |
| mMR026935 | RAD23b homolog (S. cerevisiae)                              | 1.61 | 1.15 | 0.72 | 2.18 |
| mMC002239 | interleukin 15 receptor, alpha chain                        | 1.51 | 1.13 | 0.75 | 2.17 |
| mMR028622 | RIKEN cDNA C330029B10 gene                                  | 1.65 | 1.18 | 0.72 | 2.17 |

|           |                                                             |      |      |      |      |
|-----------|-------------------------------------------------------------|------|------|------|------|
| mMC013779 | transportin 1                                               | 1.81 | 1.14 | 0.63 | 2.17 |
| mMC010971 | RIKEN cDNA 4833426J09 gene                                  | 1.58 | 1.16 | 0.74 | 2.17 |
| mMR027723 | RIKEN cDNA 2010005J08 gene                                  | 1.76 | 1.15 | 0.65 | 2.17 |
| mMC001559 | myotubularin related protein 4                              | 1.56 | 1.18 | 0.76 | 2.17 |
| mMC002061 | DNA cross-link repair 1A, PSO2 homolog (S. cerevisiae)      | 1.93 | 1.12 | 0.58 | 2.17 |
| mMC008078 | RIKEN cDNA 0910001K20 gene                                  | 1.38 | 1.15 | 0.83 | 2.17 |
| mMC004037 | angiopoietin 2                                              | 1.34 | 1.27 | 0.95 | 2.16 |
| mMR029536 | RIKEN cDNA 4632404H12 gene                                  | 1.69 | 1.13 | 0.67 | 2.16 |
| mMC001697 | calponin 2                                                  | 1.40 | 1.18 | 0.84 | 2.16 |
| mMC012026 | RNA terminal phosphate cyclase domain 1                     | 1.66 | 1.16 | 0.70 | 2.15 |
| mMC005971 | thioredoxin-like 1                                          | 1.40 | 1.09 | 0.78 | 2.15 |
| mMC014206 | RIKEN cDNA 6330403L08 gene                                  | 1.32 | 1.24 | 0.93 | 2.15 |
| mMC009860 | RIKEN cDNA 5730445M16 gene                                  | 1.74 | 1.13 | 0.65 | 2.14 |
| mMC007783 | RIKEN cDNA 5830448L21 gene                                  | 1.59 | 1.09 | 0.69 | 2.14 |
| mMR030265 | RIKEN cDNA A130022J21 gene                                  | 1.68 | 1.12 | 0.67 | 2.14 |
| mMC021819 | Cockayne syndrome 1 homolog (human)                         | 1.53 | 1.40 | 0.92 | 2.13 |
| mMC010051 | makorin, ring finger protein 1, pseudogene 1                | 1.57 | 1.20 | 0.76 | 2.13 |
| mMR029581 | dual specificity phosphatase 18                             | 1.39 | 1.16 | 0.84 | 2.13 |
| mMA031649 | Mus musculus cDNA fis, clone TRACH3013693, highly simila    | 1.47 | 1.15 | 0.78 | 2.13 |
| mMC002484 | immunoresponsive gene 1                                     | 1.61 | 2.47 | 1.53 | 2.13 |
| mMC017110 | leukocyte-associated Ig-like receptor 1                     | 1.35 | 1.24 | 0.92 | 2.12 |
| mMC023643 | potassium channel tetramerisation domain containing 9       | 1.37 | 1.28 | 0.94 | 2.12 |
| mMC017970 | dehydrogenase/reductase (SDR family) member 9               | 1.26 | 1.28 | 1.01 | 2.12 |
| mMC009039 | transducer of ErbB-2.1                                      | 1.39 | 1.22 | 0.88 | 2.12 |
| mMC012881 | RIKEN cDNA 5830458K16 gene                                  | 1.47 | 1.20 | 0.82 | 2.12 |
| mMC010551 | RIKEN cDNA 2900064B18 gene                                  | 1.46 | 1.09 | 0.75 | 2.12 |
| mMR027763 | developmentally regulated repeat element-containing transcr | 1.64 | 1.12 | 0.69 | 2.12 |
| mMC005091 | hypothetical protein D030063E12                             | 1.66 | 1.10 | 0.66 | 2.12 |
| mMR026824 | zinc finger protein 84                                      | 1.61 | 1.13 | 0.70 | 2.12 |
| mMC011487 | BTB (POZ) domain containing 4                               | 1.51 | 1.07 | 0.71 | 2.12 |
| mMC002154 | RIKEN cDNA C630016I17 gene                                  | 1.63 | 1.07 | 0.66 | 2.11 |
| mMR001241 | Mus musculus 6-phosphofructo-2-kinase/fructose-2,6-biphosyl | 1.61 | 1.08 | 0.67 | 2.11 |
| mMC003339 | farnesyl diphosphate synthetase                             | 1.46 | 1.13 | 0.78 | 2.11 |
| mMC013025 | peroxisomal biogenesis factor 13                            | 1.31 | 1.24 | 0.95 | 2.11 |
| mMC001875 | RIKEN cDNA 6230427J02 gene                                  | 1.36 | 1.23 | 0.90 | 2.11 |
| mMC026116 | tripartite motif protein 2                                  | 1.29 | 1.14 | 0.88 | 2.10 |
| mMR026594 | early endosome antigen 1                                    | 1.36 | 1.24 | 0.91 | 2.10 |
| mMC006069 | RIKEN cDNA 2310047C04 gene                                  | 1.67 | 1.09 | 0.65 | 2.10 |
| mMC005417 | cDNA sequence BC005752                                      | 1.56 | 1.14 | 0.73 | 2.10 |
| mMR028434 | RIKEN cDNA 2600014C01 gene                                  | 1.78 | 1.05 | 0.59 | 2.09 |
| mMC004371 | DnaJ (Hsp40) homolog, subfamily C, member 1                 | 1.53 | 1.16 | 0.76 | 2.09 |
| mMC006479 | mitochondrial folate transporter/carrier                    | 1.63 | 1.10 | 0.67 | 2.09 |
| mMC018242 | RIKEN cDNA 2310014H19 gene                                  | 1.47 | 1.12 | 0.76 | 2.09 |
| mMC016658 | RIKEN cDNA 4930404N11 gene                                  | 1.42 | 1.13 | 0.80 | 2.09 |
| mMC012626 | toll-like receptor 2                                        | 1.26 | 1.32 | 1.05 | 2.09 |
| mMC002162 | RIKEN cDNA 1110002E23 gene                                  | 1.56 | 1.05 | 0.67 | 2.09 |
| mMC004770 | proteasome (prosome, macropain) 28 subunit, 3               | 1.58 | 1.08 | 0.68 | 2.08 |
| mMA033015 | Mus musculus TAP binding protein-like (Tapbp1), mRNA.       | 1.39 | 1.11 | 0.80 | 2.08 |
| mMA033880 | Mouse mRNA for colony stimulating factor-1 CSF-1 (M-CSF).   | 1.42 | 1.08 | 0.76 | 2.08 |
| mMC010206 | RIKEN cDNA 1700009N14 gene                                  | 1.22 | 1.01 | 0.83 | 2.08 |
| mMC005813 | homer homolog 1 (Drosophila)                                | 1.42 | 1.13 | 0.80 | 2.08 |
| mMC011584 | RIKEN cDNA 2610304G08 gene                                  | 1.77 | 1.05 | 0.59 | 2.08 |
| mMA033074 | Mus musculus polymerase (DNA-directed), delta interacting p | 1.42 | 1.17 | 0.82 | 2.08 |
| mMC019456 | hypothetical protein MGC27770                               | 1.52 | 1.08 | 0.71 | 2.08 |
| mMC005288 | PRP4 pre-mRNA processing factor 4 homolog B (yeast)         | 1.47 | 1.42 | 0.96 | 2.08 |
| mMC012702 | F-box only protein 33                                       | 1.73 | 1.06 | 0.61 | 2.08 |
| mMC007047 | RIKEN cDNA E130113K22 gene                                  | 1.39 | 1.32 | 0.95 | 2.08 |
| mMC005319 | RIKEN cDNA 4930423F13 gene                                  | 1.50 | 1.11 | 0.74 | 2.08 |
| mMC011824 | cylindromatosis (turban tumor syndrome)                     | 1.30 | 1.27 | 0.98 | 2.08 |
| mMC025673 | cell division cycle 42 homolog (S. cerevisiae)              | 1.53 | 1.10 | 0.72 | 2.07 |
| mMC014092 | RIKEN cDNA 7330412A13 gene                                  | 1.55 | 1.08 | 0.70 | 2.07 |
| mMC021794 | cytoplasmic polyadenylation element binding protein 1       | 1.33 | 1.07 | 0.81 | 2.07 |
| mMC005478 | NK2 transcription factor related, locus 3 (Drosophila)      | 1.72 | 1.04 | 0.60 | 2.07 |
| mMC018343 | cDNA sequence BC031407                                      | 1.42 | 1.12 | 0.79 | 2.07 |
| mMA035440 | Mus musculus tripartite motif protein 23 (Trim23), mRNA.    | 1.48 | 1.08 | 0.73 | 2.07 |

|           |                                                             |      |      |      |      |
|-----------|-------------------------------------------------------------|------|------|------|------|
| mMC008884 | RIKEN cDNA 2310073E15 gene                                  | 1.46 | 1.17 | 0.80 | 2.07 |
| mMC022516 | beta-amyloid binding protein precursor                      | 1.66 | 1.07 | 0.64 | 2.06 |
| mMC024460 | transcription termination factor 1                          | 1.49 | 1.06 | 0.71 | 2.06 |
| mMC005922 | RIKEN cDNA 1110059F07 gene                                  | 1.42 | 1.08 | 0.76 | 2.06 |
| mMC003411 | inositol polyphosphate-1-phosphatase                        | 1.45 | 1.09 | 0.75 | 2.06 |
| mMC005966 | glutamine repeat protein 1                                  | 1.33 | 1.28 | 0.96 | 2.06 |
| mMC012855 | disco interacting protein 2 homolog (Drosophila)            | 1.48 | 1.10 | 0.74 | 2.06 |
| mMR001222 | Mus musculus choroideremia (Chm), mRNA.                     | 1.42 | 0.98 | 0.69 | 2.06 |
| mMR030363 | RIKEN cDNA A030012M09 gene                                  | 1.44 | 1.05 | 0.73 | 2.06 |
| mMC015490 | purinergic receptor P2Y, G-protein coupled 1                | 1.37 | 1.09 | 0.79 | 2.05 |
| mMR028216 | glycoprotein (transmembrane) nmb                            | 1.21 | 0.95 | 0.79 | 2.05 |
| mMC008674 | ganglioside-induced differentiation-associated-protein 2    | 1.71 | 1.03 | 0.61 | 2.05 |
| mMC016263 | cell division cycle 2-like 5 (cholinesterase-related cell d | 1.53 | 1.08 | 0.71 | 2.05 |
| mMC017287 | RIKEN cDNA A630026F21 gene                                  | 1.57 | 1.06 | 0.68 | 2.04 |
| mMR028519 | RIKEN cDNA E430028B21 gene                                  | 1.42 | 1.06 | 0.75 | 2.04 |
| mMC021614 | DNA segment, Chr 3, ERATO Doi 250, expressed                | 1.55 | 1.07 | 0.69 | 2.04 |
| mMC015460 | RIKEN cDNA A130090K04 gene                                  | 1.45 | 1.04 | 0.71 | 2.03 |
| mMC015892 | reticulon 4                                                 | 1.49 | 1.12 | 0.75 | 2.02 |
| mMR001383 | Mus musculus RIKEN cDNA 6030411K04 gene, mRNA (cDN          | 1.39 | 1.11 | 0.80 | 2.02 |
| mMC024110 | nuclear transcription factor-Y gamma                        | 1.37 | 1.16 | 0.84 | 2.02 |
| mMA035284 | Mus musculus 3 days neonate thymus cDNA, RIKEN full-lenç    | 1.36 | 1.06 | 0.78 | 2.02 |
| mMA034204 | Mus musculus RIKEN cDNA B230339H12 gene (B230339H1          | 1.46 | 1.09 | 0.75 | 2.01 |
| mMA034900 | Mus musculus RAD50 homolog (S. cerevisiae) (Rad50), mRN     | 1.38 | 1.06 | 0.77 | 2.01 |
| mMR028706 | type 1 tumor necrosis factor receptor shedding aminopeptida | 1.32 | 0.93 | 0.71 | 2.01 |
| mMC002356 | Rap guanine nucleotide exchange factor (GEF) 5              | 1.24 | 1.21 | 0.97 | 2.01 |
| mMC008807 | RIKEN cDNA 2500002B13 gene                                  | 1.54 | 1.05 | 0.68 | 2.01 |
| mMC008295 | checkpoint supressor 1                                      | 1.38 | 1.14 | 0.83 | 2.01 |
| mMC024582 | RIKEN cDNA D230035M11 gene                                  | 1.51 | 1.05 | 0.70 | 2.01 |
| mMC010014 | RIKEN cDNA 9130221J17 gene                                  | 1.39 | 1.02 | 0.73 | 2.01 |
| mMC001059 | ubiquitin specific protease 48                              | 1.22 | 1.09 | 0.89 | 2.01 |
| mMC019156 | expressed sequence BB123696                                 | 1.44 | 1.14 | 0.79 | 2.01 |
| mMC007253 | RIKEN cDNA 4122402O22 gene                                  | 1.28 | 0.97 | 0.76 | 2.00 |
| mMC019563 | RIKEN cDNA 1110002L01 gene                                  | 1.51 | 1.00 | 0.66 | 2.00 |
| mMC002295 | tubulin, delta 1                                            | 1.45 | 1.03 | 0.71 | 2.00 |

Supplemental Table 2. Macrophage genes upregulated following OPB +/- infection. Array data were analyzed for statistically significant genes using the Statistical Analysis of Microarray (SAM) software. Fold-change was calculated compared to uninfected cells. Using a false discovery rate threshold of <1.0% and a minimum fold-change of 2 over uninfected. Only 23 genes were differentially expressed following wildtype infection; however, 495 genes were significantly up-regulated following OPB/- *Leishmania* infection.
