# Supplementary material
Source: PubMed Central journal article supplement (PMC3013002)
Supplement: supp_M110.138313_jbc.M110.138313-3.pdf [file supp_M110.138313_jbc.M110.138313-3.pdf]

Supplemental Table 3

**Gene Families Upregulated Following OPB -/- Infection**

| Protein Family                                                   | Count | Fold Change | P-Value |
|------------------------------------------------------------------|-------|-------------|---------|
| Cytokine secretion                                               | 3     | 15.36       | 0.014   |
| Positive regulation of Ras protein signal transduction           | 4     | 14.62       | 0.002   |
| Positive regulation of cell adhesion                             | 4     | 11.37       | 0.004   |
| Positive regulation of small GTPase mediated signal transduction | 4     | 10.24       | 0.006   |
| Regulation of protein secretion                                  | 4     | 8.53        | 0.010   |
| Cytokines and Inflammatory Response                              | 3     | 8.09        | 0.047   |
| Positive regulation of phosphorylation                           | 4     | 7.87        | 0.012   |
| Positive regulation of phosphate metabolic process               | 4     | 7.31        | 0.015   |
| Protein secretion                                                | 6     | 6.40        | 0.002   |
| Inositol or phosphatidylinositol phosphatase activity            | 5     | 4.46        | 0.024   |
| Ubiquitin thiolesterase activity                                 | 6     | 3.48        | 0.027   |
| Ubiquitin-specific protease activity                             | 6     | 3.33        | 0.033   |
| Small conjugating protein-specific protease activity             | 6     | 3.19        | 0.038   |
| Protein ubiquitination                                           | 6     | 3.13        | 0.041   |
| Thiolester hydrolase activity                                    | 7     | 3.01        | 0.027   |
| Vasculature development                                          | 13    | 2.77        | 0.002   |
| Growth factor activity                                           | 7     | 2.73        | 0.042   |
| Blood vessel development                                         | 12    | 2.58        | 0.006   |
| Blood vessel morphogenesis                                       | 10    | 2.56        | 0.016   |

Supplemental Table 3. Gene families upregulated following OPB -/- infection. DAVID analysis was performed to identify families and pathways of proteins that were significantly upregulated in macrophages infected by OPB knockout *Leishmania*. Protein families that were over-represented in the hit set with a fold change greater than 2.5 and a p-value less than 0.05 are listed.
